1 **von Willebrand Factor D and EGF Domains is an evolutionarily conserved and required**  
2 **feature of blastemas capable of multi-tissue appendage regeneration**

3

4

5 Leigh N.D.<sup>1,2</sup>, Sessa S.<sup>1</sup>, Dragalzew A.C.<sup>3</sup>, Payzin-Dogru D.<sup>1</sup>, Sousa J.F.<sup>3</sup>, Aggouras A.N.<sup>1</sup>,  
6 Johnson K.<sup>1</sup>, Dunlap G.S.<sup>1</sup>, Haas B.J.<sup>2</sup>, Levin M.<sup>4,5</sup>, Schneider I.<sup>3</sup>, Whited J.L.<sup>1,2,4</sup>

7

8 Affiliations:

9

10 <sup>1</sup>Department of Stem Cell and Regenerative Biology, Harvard University, 7 Divinity Ave.  
11 Cambridge, MA, 02138, USA

12

13 <sup>2</sup>Broad Institute of MIT and Harvard, 7 Cambridge Center, Cambridge, MA, 02142, USA

14

15 <sup>3</sup>Instituto de Ciências Biológicas, Universidade Federal do Pará, 66075-900 Belém, Brazil

16

17 <sup>4</sup>Allen Discovery Center at Tufts University, Tufts University, Medford, MA, 02155, USA

18

19 <sup>5</sup>Department of Biology, Tufts University, Medford, MA 02155, USA

20 **Abstract**

21 Regenerative ability varies tremendously across species. A common feature of regeneration of

22 appendages such as limbs, fins, antlers, and tails is the formation of a blastema--a transient

23 structure that houses a pool of progenitor cells that regenerate the missing tissue. We have

24 identified the expression of *von Willebrand Factor D and EGF Domains* (*vwde*) as a common

25 feature of blastemas capable of regenerating limbs and fins in a variety of highly regenerative

26 species. Further, *vwde* expression is tightly linked to the ability to regenerate appendages.

27 Functional experiments demonstrate a requirement for *vwde* in regeneration and indicate that

28 *Vwde* is a potent mitogen in the blastema. These data identify a key role for *vwde* in regenerating

29 blastemas and underscore the power of an evolutionarily-informed approach for identifying

30 conserved genetic components of regeneration.

31 **Introduction**

32       The underlying reasons why some animals have the ability to regenerate complex  
33 structures, while others cannot, remains an important and open question. This knowledge gap has  
34 led to intense study of how regeneration-competent species are able to perform complex multi-  
35 tissue regeneration, with a particular focus on the ability to regenerate paired appendages, such  
36 as limbs and fins. However, this has long been a pursuit without an understanding of whether this  
37 ability was present when paired appendages first evolved or was acquired by certain  
38 phylogenetic lineages (e.g. urodele amphibians).

39       Recent work regarding the evolutionary origins of regenerative capacity has indicated  
40 that the ability to regenerate paired appendages is an inherited feature of the fin-to-limb  
41 transition [1–4]. Evidence found in the fossil record [3,4], functional studies across species [2],  
42 and comparisons of gene expression profiles of regenerating tissue [1,2] support the notion that  
43 paired appendage regeneration is a feature lost by certain lineages and was not a newly derived  
44 capacity in highly regenerative lineages. This indicates that the amniote lineage (which includes  
45 humans) has lost regenerative tendencies in appendages over evolutionary time. Therefore, the  
46 ability to stimulate regeneration in non-regenerative species, potentially in a therapeutic context,  
47 may require the re-initiation of a core, evolutionary conserved program.

48       All species that are able to regenerate appendages share a conserved trait: the ability to  
49 form a blastema. The blastema is the morphological structure that forms at the amputation plane  
50 and houses the progenitor cells responsible for regeneration. Recent efforts have focused on  
51 elucidating the molecular definition of the blastema, with many of these efforts aimed at the  
52 axolotl limb blastema due to the ease of tissue acquisition and the ability to perform  
53 experimentation in the lab [5–13]. These studies provide a wealth of information about  
54 transcriptomic changes over time, cell types, and blastema-enriched genes. More recently,

55 sequencing efforts of non-model species have allowed for comparisons to the axolotl limb  
56 blastema and indicate a core molecular signature that is shared between the blastemas of  
57 distantly related species [1,2]. Due to these similarities and the common evolutionary origin of  
58 limb regeneration capacity, we can use an evolutionarily-informed approach to understand what  
59 constitutes a blastema and for identifying core features required for regeneration.

60         A recent approach to identify the unique gene expression in the axolotl limb blastema  
61 compared blastema gene expression to a variety of homeostatic and embryonic tissues and  
62 identified over 150 blastema-enriched genes [11]. These blastema-enriched genes may help to  
63 explain the unique functions of the blastema, but the question remains as to whether these genes  
64 represent a core program or are functionally required for regeneration. One of the most blastema-  
65 enriched genes in this dataset was *von Willebrand Factor D and EGF Domains (vwde)*, which to  
66 date has not been functionally studied in any context.

67         We decided to apply an evolutionary framework to determine if *vwde* fit the description  
68 of an evolutionary-conserved, blastema-enriched gene and if such an approach may help to  
69 identify genes required for regeneration. We found that *vwde* expression is a common feature of  
70 both fin and limb blastemas and was highly enriched in regenerating appendages as compared to  
71 pre-amputation intact appendages. In addition, using the natural regeneration-competent and  
72 regeneration-refractory periods during *Xenopus laevis* development, we observed that *vwde*  
73 expression was tightly linked to the regeneration-component environment. This suggests that  
74 *vwde* may be a critical factor in the regenerative niche. Finally, we found that *vwde* is  
75 functionally required for axolotl limb regeneration, with transient knockdown of protein levels  
76 resulting in aberrant regeneration. These data suggest that an evolutionarily-informed approach

77 can help to prioritize target genes and that genes that are blastema-enriched across different  
78 species may prove to be critical factors in the ability to regenerate appendages.

79

80

## 81 **Results**

82 With the goal of identifying genes enriched to the regenerating blastema, a tissue-mapped  
83 axolotl transcriptome was recently published [11]. Of particular interest are blastema-enriched  
84 genes with high expression in the blastema and relative low expression in all other tissues  
85 sampled. We found that *vwde* was highly enriched to the axolotl limb blastema (Figure 1A). This  
86 analysis, however, was limited to one time point, the medium-bud blastema, and it did not  
87 provide spatial information about the expression of *vwde* across the regenerating limb. To  
88 understand the spatial and temporal regulation of *vwde*, we performed RNA *in situ*  
89 hybridizations over a time course of axolotl limb regeneration. We found *vwde* expression to be  
90 tightly tied to the presence of a blastema and expressed exclusively in the blastema and not the  
91 overlying wound epidermis (Figure 1B-E). Thus, *vwde* fits the description of an axolotl limb  
92 blastema-enriched gene and we were interested in pursuing whether *vwde* may be a core  
93 component of blastemas able to regenerate appendages.

94 We next sought to determine if *vwde* was present in a selection of deuterostomes,  
95 including species with various regenerative abilities. Using a comparative genomics approach  
96 [14], we found *vwde* to have orthologs across deuterostomes (though no ortholog was detected in  
97 *Ciona intestinalis*), as well as a non-blastema-enriched paralogous gene in axolotl and other  
98 species (Figure 1F, Supplementary Figure 1). We compared axolotl VWDE to proteins from  
99 other species, and we found putative orthologs harboring predicted von Willebrand Factor D

100 domains and EGF-like domains. The number of EGF domains may be more variable across  
101 species. However, since this gene has not yet been studied in-depth in any species, additional  
102 experimental work may be required to fully characterize the expressed transcripts and proteins  
103 for individual species. Using these identified orthologs, we moved forward to ask whether *vwde*  
104 was a blastema-enriched gene during paired fin regeneration.

105 We explored the possibility that *vwde* could be a common feature of blastemas  
106 responsible for regenerating paired fins, which share a deep homology with limbs [15], and  
107 likely share an inherited gene regulatory program for regeneration [1,2]. We chose two highly  
108 regenerative, but distantly related, fish species to determine if *vwde* expression was a conserved  
109 feature of blastemas capable of regenerating paired appendages. These include a species in the  
110 sister group to tetrapods, the Lungfish (*Lepidosiren paradoxa*), which is a lobe-finned fish, and  
111 *Polypterus senegalus*, a ray-finned fish that is capable of regenerating after amputation through  
112 skeletal elements that develop by endochondral ossification. We first inspected publicly available  
113 transcriptome datasets of lungfish and *Polypterus* regenerating fins for the *vwde* orthologs we  
114 previously identified (Figure 1F). The lungfish LG29893\_g1\_i1 contig was upregulated in  
115 blastemas 21 days post-amputation (dpa) relative to uninjured fins [1], and the *Polypterus*  
116 PS64836c0\_g1\_i1 contig was upregulated in 9 dpa blastemas relative to uninjured fins [2].  
117 Assessment of expression levels via qPCR at various regeneration stages showed an upregulation  
118 of *vwde* coinciding with blastema formation during lungfish fin regeneration (Supplemental  
119 Figure 2A).

120 A similar pattern was seen for *Polypterus* fin regeneration, with expression reaching  
121 highest levels at 5 dpa (Supplemental Figure 2B). Next, we assessed the spatial pattern of *vwde*  
122 in histological sections of regenerating fins. Lungfish 21 dpa blastemas show distal

123 mesenchymal expression of *vwde* (Figure 2A). In 5 dpa *Polypterus* blastemas, expression is  
124 observed distal to the amputation plane in mesenchymal cells but also in the epithelium,  
125 suggesting that *Polypterus* may use *vwde* in both compartments (Figure 2C). *In situ* hybridization  
126 with control sense probes did not yield specific signal (Supplemental Figure 2C-D).  
127 Histologically, these samples are similar to the medium-bud blastema time point in which we  
128 identified *vwde* in the axolotl limb (Figure 2B, 2D). Together, these data indicate that *vwde* is  
129 expressed in regenerating fins and limbs and that *vwde* expression is a conserved feature of  
130 blastemas.

131 To further investigate *vwde* during regeneration, we took advantage of the regeneration-  
132 competent and regeneration-refractory periods during *Xenopus laevis* tail development [16]. A  
133 blastema forms in response to amputation during both distinct developmental stages, but only in  
134 the regeneration-competent setting is full regeneration accomplished. This developmental feature  
135 provides an ideal situation to compare regeneration-competent versus regeneration-refractory  
136 environments. We reasoned that finding factors that differentiate these two contexts may provide  
137 clues for identifying the core requirements for successful regeneration. We probed for the  
138 expression of *vwde* during the regeneration-competent and regeneration-refractory periods of  
139 *Xenopus laevis* tail regeneration. Interestingly, we found that *vwde* expression was present in  
140 tails prior to amputation in both the regeneration-competent and regeneration-refractory setting  
141 (Figure 3A-B, 3G-H). We found robust *vwde* expression along the peripheral edge of the  
142 amputation plane and near the blastema in regeneration-competent tails (Figure 3C-F). In  
143 contrast, in the regeneration-refractory setting, *vwde* expression was restricted to the peripheral  
144 edges of the amputation plane and was not detected near the blastema (Figure 3I-L). This  
145 indicated a striking correlation between *vwde* expression and regeneration, providing evidence

146 that *vwde* may be an important factor in forming a pro-regenerative niche. These expression data  
147 across a range of species indicate that *vwde* fits the profile of an evolutionarily-conserved,  
148 regeneration-enriched gene and that *vwde* may play an important role in the blastema niche.

149 To investigate if *vwde* is required for regeneration, we performed morpholino-mediated  
150 knockdown at its peak expression in the medium-bud limb blastema. We found a substantial  
151 reduction in the length of the blastemas when *Vwde* was knocked down with two separate  
152 translation-blocking morpholinos (Figure 4A-B). Fluorescent reporter constructs with *vwde*-  
153 morpholino binding sites confirmed that both unique *vwde*-targeting morpholinos were capable  
154 of blocking translation (Supplemental Figure 3). Due to the dramatic reduction in blastema  
155 length, we investigated if *vwde* was important for blastema proliferation and/or cell survival. We  
156 found that knockdown of *Vwde* substantially reduced blastema cell cycle entry (Figure 4C-D)  
157 and did not alter cell survival compared to control limbs (Supplemental Figure 4). Due to the  
158 observed delay in blastema growth, we questioned whether blastemas treated with translation-  
159 blocking morpholinos were capable of recovering from the transient knockdown of *Vwde* and  
160 produce fully regenerated limbs. We therefore performed the same *Vwde* morpholino-mediated  
161 knockdown on a separate group of axolotls, and then allowed for the full course of regeneration  
162 to complete, harvesting limbs more than eight weeks post-amputation. We observed that one-  
163 time injection of *Vwde*-targeting morpholino caused substantial abnormalities in regenerated  
164 limbs, suggesting an essential role for *vwde* during limb regeneration (Figure 4E-G). We found  
165 defects in 4.2% (1/24) control limbs compared to 46% (13/28) of limbs treated with *vwde* MO1  
166 and 25% (5/20) of limbs treated with *vwde* MO2 (Fisher's exact test  $P < 0.05$ ) (Figure 4F, Table  
167 1, Supplemental Figure 5). A second experiment yielded similar results, with defects at endpoint  
168 in 27.6% (8/29) of control (*vwde* MO1 inverted) treated limbs compared to 47% (18/38) of limbs



169 treated with *vwde* MO1 (Fisher's exact test  $P < 0.05$ ) (Figure 4G, Table 2, Supplemental Figure  
170 6). We found a variety of defects, some of which are reminiscent of limb development  
171 phenotypes where limited distal elements are present such as has been observed in *fgf4,8*-double-  
172 knockout mice [17] and in the absence of *sonic hedgehog (ssh)* [18]. In addition, these  
173 phenotypes also resemble the defective regenerative spike characteristic of *Xenopus* limb  
174 regeneration [19]. Altogether, these data highlight the functional requirement for *vwde* during  
175 limb regeneration.

## 176 177 **Discussion**

178 Recent work, most notably next generation sequencing, has led to a plethora of  
179 information about the genes and cells that define the blastema [1,2,5–13]. However, it is difficult  
180 to determine which genes may have functional relevance based purely on their expression. We  
181 decided to investigate a single blastema-enriched gene, *vwde*, using an evolutionarily-informed  
182 approach, assuming that a gene whose expression is enriched in blastemas of multiple, distantly-  
183 related, species is likely a key factor during regeneration.

184 The *in vivo* assays used here place *Vwde* as a critical regulator of cell cycle entry during  
185 axolotl limb regeneration. Proliferation is a complex, but fundamental, aspect of regeneration, as  
186 there are many different cell types and potential origins of proliferative signals. Previous work  
187 indicates that mitogenic signals are produced directly following amputation independent of the  
188 nerve or wound epidermis [20,21], but are also provided by the nerve [22,23] or wound  
189 epidermis [24]. There are thus multiple sources of mitogenic signals in the regenerating limb, but  
190 it is unclear if mitogenic signals from multiple tissues are required simultaneously or perhaps in  
191 a more stepwise fashion to maintain blastema proliferation. Our data indicate that *Vwde* may be  
192 a blastema progenitor cell-derived mitogen, which adds to the potential sources of proliferative

193 signals in the regenerating limb. It has been previously postulated that nerve-derived signals are  
194 required early on during blastema formation and growth, but a fibroblast-derived factor is  
195 required for complete regeneration [25]. We speculate that *vwde*, which appears to be expressed  
196 across the majority of cells in the blastema including likely fibroblasts, may provide one of the  
197 essential fibroblast-derived factors required after the nerve has provided sufficient input. While  
198 there is limited knowledge of fibroblast- or blastema cell-derived mitogens, *in vitro* cultures have  
199 shown that blastema protein extracts are able to drive blastema cell proliferation [26]. More  
200 generally, a global and temporally-based view of the cellular origins of mitogens and the cell  
201 types that require these mitogens will provide a better understanding of what is driving  
202 proliferation during different stages of regeneration.

203         In addition to the dramatic reduction in proliferation, we observed striking end point  
204 phenotypes after transient knockdown of *Vwde*. The loss of distal elements and spike-like  
205 phenotypes observed after *Vwde* knockdown suggest that *Vwde* plays a role in proximal-distal  
206 determination in the regenerating limb. These phenotypes showing similarities to *ssh* and *fgf4,8*-  
207 double-knockout mice, suggest that *Vwde* may be working similarly to—or in concert with—  
208 FGFs during regeneration. Though many FGFs are epidermal factors during limb development in  
209 mice and chick, FGFs are expressed in the mesenchyme during axolotl limb development [27]  
210 and regeneration [28]. Thus, it may be that during axolotl limb regeneration, blastema-derived  
211 factors are primarily responsible for proximal-distal patterning and that *Vwde* is working to  
212 promote the formation of distal elements. Intriguingly, *vwde* has remained unexplored in highly  
213 studied, but less regenerative species such as mouse and human, so whether *vwde* plays a role in  
214 limb development in these species is unknown.

215           It is interesting to speculate on what has been lost in amniotes that prevents appendage  
216 regeneration. One possibility is genes that are lost in amniotes and present in anamniotes can  
217 explain differences in regenerative capacity [29]. However, the absence of a gene in amniotes is  
218 not necessarily a prerequisite when considering which candidate genes might be responsible for  
219 high regenerative capacity. Alternative scenarios include, but are not limited to, genes that have  
220 lost ancestral pro-regenerative function or have altered expression domains/kinetics. *Vwde* may  
221 fit the paradigm of a gene that is present in both regeneration-competent and regeneration-  
222 incompetent species, but may exclusively be used in the blastema, a structure that cannot be  
223 produced by most regeneration-incompetent species.

224           While the blastema is required for regeneration, wound healing and activation of  
225 progenitor cells required for formation of the blastema must precede blastema formation. Based  
226 on the expression profile, we do not expect *vwde* to be a driver of blastema formation, but more  
227 likely a downstream effector once a blastema has been established. In most cases of amputation  
228 in less regenerative species, the blastema is not able to form, and thus we suspect that a more  
229 upstream or systemic factor may prevent blastema formation. While there may have initially  
230 been one primary cause of the loss of regenerative ability, such as the rise of adaptive immunity  
231 [30] or trade-offs associated with endothermy [31], it is likely that other aspects of the  
232 regenerative response have now been lost due to their lack of utility. If *vwde* played a relatively  
233 specialized function in the blastema and blastemas generally do not exist in less regenerative  
234 species then the use for *vwde* decreases. This could explain why 42.7% of human genomes have  
235 a predicted loss-of-function copy of *VWDE*, leading to speculation that *VWDE* is potentially  
236 drifting towards inactivation in the human population [32]. While the blastema remains the  
237 elusive feature required for appendage regeneration, this work illustrates that taking an

238 evolutionarily-informed approach can lead to identification of functionally important genes. This  
239 also suggests that further work to understand the similarities between different species blastemas  
240 may help to elucidate the core molecular program of the blastema.

241 **Methods**

242

243 **Animal Experimentation**

244 All axolotl experiments were performed in accordance with Brigham and Women's Hospital  
245 Institutional Animal Care and Use Committee in line with Animal Experimentation Protocol  
246 #04160. All animals were bred in house, but the colony was originally derived from animals  
247 obtained from Ambystoma Genetic Stock Center (Lexington, KY, NIH grant P40-OD019794).  
248 For amputations, animals were narcotized in 0.1% MS-222, confirmed to be fully narcotized by  
249 pinch test, amputated mid-zeugopod and the bone was trimmed. Animals were allowed to  
250 recover overnight in 0.5% sulfamerazine. For all functional experiments, all four limbs were  
251 amputated and injected individually. Functional experiments were performed on animals ranging  
252 from 3.8-8cm.

253 *Polypterus senegalus* and *Lepidosiren paradoxa* were maintained in individual tanks in a  
254 recirculating freshwater system. Animals were anesthetized before amputations: *P. senegalus* in  
255 0.1% MS-222 (Sigma) and *L. paradoxa* in 0.1% clove oil diluted in the system water. Experiments  
256 and animal care were performed following animal care guidelines approved by the Animal Care  
257 Committee at the Universidade Federal do Para (protocol no. 037-2015). Pectoral fins in both  
258 species were bilaterally amputated. For *L. paradoxa* fins were amputated at approximately 1 cm  
259 distance from the body, and for *P. senegalus*, fins were amputated across the fin endoskeleton.  
260 Amputated fins (regenerating and uninjured) were used for histology, *in situ* hybridization and  
261 qRT-PCR analysis.

262 **Electroporation**

263 Electroporation was performed while axolotls were narcotized in 0.1% tricaine and subsequently  
264 immersed in ice cold 1x PBS using a NepaGene Super Electroporator NEPA21 Type II  
265 electroporator. Settings for electroporation included: 3 poring pulses at 150 Volts with a pulse  
266 length of 5 milliseconds, a pulse interval of 10 milliseconds, a decay rate of 0 %, and a positive  
267 (+) polarity. Transfer pulse consisted of 5 pulses at 50 Volts with a pulse length of 50 milliseconds,  
268 a pulse interval of 950 milliseconds, a decay rate of 0 %, and a positive (+) polarity.

269 **qRT-PCR.**

270 Total RNA from regenerating or uninjured pectoral fins was extracted using TRIzol reagent  
271 (Thermo Fisher Scientific). Residual DNA removal and RNA cleanup were performed following

272 the RNeasy Mini Kit (Qiagen) protocol. cDNA was synthesized from 0.5 µg RNA using the  
273 Superscript III First-Strand Synthesis Supermix (Thermo Fisher Scientific) with oligo-dT. For  
274 qPCR, amplification reactions (10 µl) prepared with the GoTaq Probe qPCR Master Mix  
275 (Promega) were run in a StepOnePlus Real-Time PCR System (Applied Biosystems). Gene-  
276 specific oligos (Table 3) for qRT-PCR assays were designed using Primer 3.0  
277 (<http://bioinfo.ut.ee/primer3/>) and used in a final concentration of 200 nM to each primer. Each  
278 qPCR determination was performed with three biological and three technical replicates. Relative  
279 mRNA expressions were calculated with the  $2^{-\Delta\Delta CT}$  method [33], using *sdha* (*P. senegalus*) or  
280 *polrc1* (*L. paradoxa*) genes as endogenous control and the uninjured fin (mean  $\Delta CT$  value of the  
281 three biological replicates) as reference sample.

### 282 **In Situ Hybridization**

283 For *in situ* hybridization using axolotl samples a gene fragment from the 3' UTR was amplified  
284 from blastema cDNA and cloned into the pGEM-T Easy vector and sequenced. Depending upon  
285 orientation, T7 or Sp6 polymerase was used to transcribe the probe. Primers for *in situ* probes  
286 against axolotl *vwde* (contig c1084387\_g3\_i1 from [11]) can be found in Table 3. Colorimetric  
287 *in situ* hybridization in axolotl tissue harvested from animals with snout to tail lengths of 9.5-  
288 11.5cm and was performed as previously described at protocols.io  
289 (<https://www.protocols.io/view/rna-in-situ-hybridization-p33dqgn>).

290 For *in situ* hybridizations with fish samples, fins of *P. senegalus* (5 dpa and uninjured) and *L.*  
291 *paradoxa* (21 dpa and uninjured) were amputated, embedded in TissueTek O.C.T compound  
292 (Fisher Scientific), and maintained at  $-80^{\circ}\text{C}$  until use. Frozen sections of 20 µm were obtained on  
293 a Leica CM1850 UV cryostat, positioned on slides (Color Frost Plus/Thermo Fisher Scientific)  
294 and fixed as previously described [1]. Riboprobe templates containing a gene-specific segment  
295 (400-500 bp) and a T7 promoter sequence were produced by a 2-round PCR strategy (primers are  
296 listed in Table 3). Riboprobes were synthesized with T7 RNA polymerase (Roche) and DIG-  
297 labeling mix (Roche). Controls probes (sense riboprobes) were synthesized from a template  
298 containing the T7 promoter in a reverse orientation. A total of 300 ng of DIG-labeled riboprobe  
299 was used per slide during *in situ hybridization* performed as previously described [1]. Images were  
300 obtained on a Nikon Eclipse 80i microscope and processed using the NIS-Element D4.10.1  
301 program.

## 302 **Whole mount RNA-FISH**

303 *Xenopus laevis* eggs were obtained, fertilized, and cultured as embryos at 18 °C using standard  
304 methods as in [34]. All experimental procedures using *Xenopus laevis* were approved by the  
305 Institutional Animal Care and Use Committee (IACUC) and Tufts University Department of  
306 Laboratory Animal Medicine (DLAM) under protocol number M2017-53. Once embryos reached  
307 regeneration-competent (Stage 40) or regeneration-incompetent (Stage 46) stages, animals were  
308 anesthetized using 0.005% MS222 in 0.1X MMR and tails were amputated at the posterior third  
309 of the tail and allowed to regenerate for 24 hours. Embryos at both stages, which had not been  
310 amputated, were also collected as intact controls. Regenerating and intact control embryos were  
311 anesthetized in 0.005% MS222 and then fixed at 4°C, rocking overnight, in either 4%  
312 paraformaldehyde in 1X DEPC PBS or MEMPA buffer (0.1 M MOPS (pH 7.4), 2 mM EGTA, 1  
313 mM MgSO<sub>4</sub>, 3.7% paraformaldehyde). We used a slightly modified whole-mount mouse protocol  
314 [35] using hybridization chain reaction v3.0 [36] with slight modifications. After overnight  
315 incubation, embryos were washed 3 times for 5 min in PBST and then taken through a methanol  
316 series on ice. This series consisted of 10 min washes on ice in ice cold 25%MeOH/75% PBST,  
317 50%MeOH/50% PBST, 75%MeOH/25%PBST, 100%MeOH, and then finally stored in a fresh  
318 100%MeOH solution. Dehydrated embryos were then stored at -20°C until use. For *in situ*,  
319 embryos were subsequently rehydrated via a reverse methanols series, on ice, with 10 min washes  
320 of 75% MeOH/25% PBST, 50% MeOH/50% PBST, 25% MeOH/75% PBST, 100% PBST, and  
321 another final wash in 100% PBST. Embryos were then digested with proteinase K (10µg/mL) in  
322 DEPC PBS for 5 minutes at room temperature. Post-fixation was then performed in 4% PFA in  
323 1X DEPC PBS for 20 minutes at room temperature. Next, three five minutes washes with PBST  
324 at room temperature was followed by 5 minutes at 37°C in hybridization solution (50% formamide,  
325 5x sodium chloride sodium citrate (SSC), 9 mM citric acid (pH 6.0), 0.1% Tween-20, 50µg/mL  
326 heparin, 1x Denhardt's solution, and 20% dextran sulfate). Samples were pre-hybridized by full  
327 immersion in hybridization solution without probes for 30 min at 37°C. Hybridization was  
328 performed overnight at 37°C with samples immersed in hybridization solution containing twenty  
329 probe pairs against *vwde.L* (XM\_018267342.1) diluted at 1:200 of 1 µM (hybridization chain  
330 reaction v3.0 RNA fluorescent *in situ* probes were ordered from Molecular Instruments  
331 (<https://www.molecularinstruments.com/>). The following day, samples were washed four times at  
332 37°C in probe wash buffer (50% formamide, 5X SSC, 9 mM citric acid (pH 6.0), 0.1% Tween-20,

333 and 50 $\mu$ g/mL heparin). Samples were then washed two times in 5X SSC at room temperature. Pre-  
334 amplification was then performed at room temperature for 30 minutes in amplification buffer (5X  
335 SSC, 0.1% Tween-20, 10% dextran sulfate). During pre-amplification, hairpin probes (ordered  
336 from <https://www.molecularinstruments.com/>) compatible with *vwde.L* probe pairs were heated  
337 individually at 95°C for 30 seconds and then snap cooled for 30 min at room temperature in the  
338 dark. After 30 minutes, probe pairs were added to amplification buffer at 1:50 (3  $\mu$ M stock) and  
339 this probe containing buffer was subsequently added to samples, ensuring that samples were fully  
340 immersed. Incubation was performed overnight at room temperature. The next day, samples were  
341 washed for 5 min in 5X SSCT, twice for 30 min in 5X SSCT, and a 5 min wash in 5X SSCT.  
342 Samples were then stained with DAPI for 5 min in 1X PBS, washed for 5 min in 1X PBS, and then  
343 stored in 1X PBS. Samples were then mounted in low melt agarose and imaged on a Zeiss LSM  
344 880 Upright. A median 3x3 filter followed by maximum projection was applied to all images.

#### 345 **Morpholino design and administration**

346 Morpholinos were designed and synthesized by GeneTools. Morpholino sequences can be found  
347 in Table 3. About 1.25  $\mu$ l of morpholino was injected in the blastema and electroporation was  
348 performed as described in Electroporation. All morpholinos were 3' fluorescein conjugated to  
349 allow for visualization. Morpholinos were reconstituted to 1 mM in 2X PBS and diluted to a  
350 working concentration of 500  $\mu$ M in 1X PBS prior to injection.

351

352

#### 353 **EdU staining**

354 Stock solutions of 5-ethynyl-2'-deoxyuridine (EdU) dissolved in dimethyl sulfoxide were  
355 prepared per manufacturer's instructions (Thermo Fisher). Axolotls (3-6cm tail to snout) were  
356 narcotized in 0.1% tricaine at 7 days post amputation and control or *Vwde*-targeting morpholino  
357 was injected and subsequently electroporated as described in Electroporation section of methods  
358 into the blastema. At 9 dpa, intraperitoneal injections with 400  $\mu$ M EdU in 0.7X PBS at a  
359 volume of 20 $\mu$ L/g were performed. 18 hours later blastemas were harvested, fixed for 1-2h in  
360 4% PFA and then taken through a sucrose gradient to 30% sucrose in 1x PBS. Tissue was then  
361 embedded in OCT and frozen in a dry ice/ethanol bath. Sections were cut at 16  $\mu$ m with a  
362 cryostat, collected on Superfrost Plus slides (Fisher), and stored at -80°C. EdU staining was



363 performed with the Click-iT EdU Alexa Fluor 594 Imaging Kit per manufacturers instructions  
364 (Thermo Fisher).

365

### 366 **TUNEL assay**

367 TUNEL assays were performed as previously described [11]

368

### 369 **Skeletal preparations and scoring**

370 Limbs were stained with Alcian blue/Alizarin red according to [37]. In brief, limbs were  
371 incubated with rocking overnight in 95% ethanol and then rocking overnight an acetone. Limbs  
372 were then incubated for at least 7 days in alcian blue/alizarin red at 37 °C. Limbs were then  
373 cleared by incubation in 1% (wt/vol) KOH, followed by 1% (vol/vol) KOH/25% glycerol, 1%  
374 KOH/50% glycerol, and 1% KOH/75% glycerol. Limbs were imaged in 1% KOH/75% glycerol.  
375 Alcian blue stock was 0.3% alcian blue in 70% ethanol; alizarin red stock was 0.1% alizarin red  
376 95% ethanol; the working solution was 5% alcian blue stock/5% alizarin red stock/5% glacial  
377 acetic acid/volume in 70% ethanol.

378 Definitions for limbs after regeneration. Normal: All digits and carpals present, zeugopod and  
379 stylopod intact. Spike: Single outgrowth from amputation plane without obvious turn at joint. Loss  
380 of distal elements: Distal elements without obvious autopod. Oligodactyly: Loss or reduction in  
381 size at least one digit. Syndactyly: Fusion of digits. Additional elements: Extra bones in stylopod  
382 or zeugopod. For statistical analysis normal was compared to all of the above listed abnormalities.

### 383 **Ortholog analysis**

384 The following proteomes were downloaded from uniprot.org, human (*Homo sapiens*,  
385 UP000005640, accessed 5/18/2019), zebrafish (*Danio rerio*, UP000000437, accessed  
386 5/18/2019), mouse (*Mus musculus*, accessed 5/18/2019), amphioxus (*Branchiostoma floridae*,  
387 accessed 8/27/2019), chick (*Gallus gallus*, accessed 8/27/2019), sea squirt (*Ciona intestinalis*,  
388 accessed 8/27/2019), lamprey (*Petromyzon marinus*, accessed 8/27/2019), green anole (*Anolis*  
389 *carolinensis*, 8/27/2019), frog (*Xenopus laevis*, UP000186698, accessed 7/11/2019), frog  
390 (*Xenopus tropicalis*, UP000008143, accessed 7/11/2019). The South American lungfish  
391 transcriptome was downloaded from <https://www.ncbi.nlm.nih.gov/Traces/wgs/?val=GEHZ01>  
392 and converted to a putative reference protein using TransDecoder (version 5.3.0) like so:  
393 `TransDecoder.LongOrfs -t`. The *Polpyterus* transcriptome can be found here:  
394 <https://www.ncbi.nlm.nih.gov/bioproject/480698> and converted with TransDecoder as referenced

395 above. The axolotl (*Ambystoma mexicanum*) predicted proteome was obtained from  
396 [https://data.broadinstitute.org/Trinity/SalamanderWeb/Axolotl.Trinity.CellReports2017.transdec](https://data.broadinstitute.org/Trinity/SalamanderWeb/Axolotl.Trinity.CellReports2017.transdecoder.pep.gz)  
397 [oder.pep.gz](https://data.broadinstitute.org/Trinity/SalamanderWeb/Axolotl.Trinity.CellReports2017.transdecoder.pep.gz) [11]. Cloning of axolotl *vwde* revealed a sequencing error in the axolotl  
398 transcriptome which eliminated the first ~500bp of the sequence. We manually changed the  
399 axolotl proteome to include this corrected version of *vwde* (Supplementary File 1).

400 To predict orthologs, we used OrthoFinder2.0 (version 2.3.3) [14]. Orthofinder was implemented  
401 as follows:

```
402 `orthofinder -f /path/to/proteomes -M msa -A mafft -T fasttree -t 20 -o /path/to/output/directory`
```

### 403 **Protein domain diagrams**

404 The R package, drawProteins [38] was used to draw protein domains for different species *Vwde*.  
405 For all genes contained within Uniprot, these were downloaded directly with drawProteins. For  
406 genes not available via Uniprot (<https://www.uniprot.org/>)[39] (e.g. *Polpyterus*, axolotl, and  
407 Lungfish), the amino acid sequence of the protein was queried via Interpro with default settings  
408 (<https://www.ebi.ac.uk/interpro/>)[40] and positions and domain annotations were extracted and  
409 made into a matrix that matched the required structure for drawProteins. The Uniprot version of  
410 mouse *vwde* (Uniprot ID: Q6DFV8) in the proteome used did not co EGF-like domains, so we  
411 manually searched UCSC genome browser to confirm this lack of EGF-like domains. This  
412 revealed a full length *Vwde* (ENSMUST00000203074.2), which was then fed into Interpro and  
413 domains were manually input into drawProteins.

414

### 415 **Vwde knockdown confirmation**

416 Two separate constructs to test the target specificity of each MO used. GFP was removed and  
417 from pCAG-GFP (pCAG-GFP was a gift from Connie Cepko (Addgene plasmid # 11150 ;  
418 <http://n2t.net/addgene:11150> ; RRID:Addgene\_11150)[41] and replaced with vectors containing  
419 td-Tomato sequence and the morpholino binding site (Supplementary File 2). To confirm  
420 knockdown we co-injected and electroporated into medium-bud blastemas the generated  
421 constructs and the appropriate fluorescein-conjugated morpholino. Fluorescein fluorescence was  
422 used to confirm injection efficiency and td-tomato expression was used to measure ability to  
423 block translation.

424

425 **Statistics**

426 Nested one way ANOVA was used to determine significance between blastema lengths. Each  
427 limb was considered a technical replicate within one biological (i.e. animal) replicate. Nested t  
428 tests were used to determine significance in EdU and TUNEL experiments, again treating each  
429 limb as a technical replicate and placing limbs from the same animal within one biological  
430 replicate. Fisher's exact tests (control vs. treated) were used to determine significance of  
431 outgrowth phenotypes. Significant results were considered as  $P < 0.05$ .

432 **Contributions**

|                            | NDL | SS | ACD | DPD | JFS | ANA | KJ | GSD | BJH | ML | IS | JLW |
|----------------------------|-----|----|-----|-----|-----|-----|----|-----|-----|----|----|-----|
| Wrote the paper            |     |    |     |     |     |     |    |     |     |    |    |     |
| Initiation/conception      |     |    |     |     |     |     |    |     |     |    |    |     |
| Corresponding author       |     |    |     |     |     |     |    |     |     |    |    |     |
| Animal experiments/in situ |     |    |     |     |     |     |    |     |     |    |    |     |
| Orthology analysis         |     |    |     |     |     |     |    |     |     |    |    |     |
| Experimental design        |     |    |     |     |     |     |    |     |     |    |    |     |
| Manuscript editing         |     |    |     |     |     |     |    |     |     |    |    |     |
| Contributed resources      |     |    |     |     |     |     |    |     |     |    |    |     |

433

434 **Acknowledgements**

435 This work was supported by the Eunice Kennedy Shriver National Institute of Child and Human  
436 Development of the National Institutes of Health (5R03HD083434-02 to J.L.W.). N.D.L. was  
437 supported by Award Number F32HD092120 from the Eunice Kennedy Shriver National Institute  
438 of Child and Human Development of the National Institutes of Health. Portions of this research  
439 were conducted on the O2 High Performance Compute Cluster, supported by the Research  
440 Computing Group, at Harvard Medical School. See <http://rc.hms.harvard.edu> for more  
441 information. Support for work on lungfish and *Polypterus* was provided by CNPq Universal  
442 Program Grant 403248/2016-7 and CAPES/DAAD PROBRAL Grant 88881.198758/2018-01 to  
443 I.S, and a postdoctoral fellowship from CNPq to A.C.D. We thank William Ye, Adam Gramy,  
444 Sarah Lemire, and Bonney Couper-Kiablick for expert animal care and other members of the  
445 Whited lab for feedback and discussions. We also thank Dr. Mansi Srivastava and Dr. Ryan  
446 Walker for their insights on orthology and protein structure and Dr. James Monaghan and  
447 Timothy Duerr for sharing information on whole mount in situ protocols.

## 448   **References**

- 449   1.   Nogueira, A.F., Costa, C.M., Lorena, J., Moreira, R.N., Frota-Lima, G.N., Furtado, C.,  
450       Robinson, M., Amemiya, C.T., Darnet, S., and Schneider, I. (2016). Tetrapod limb and  
451       sarcopterygian fin regeneration share a core genetic programme. *Nat. Commun.* 7, 13364.
- 452   2.   Darnet, S., Dragalzew, A.C., Amaral, D.B., Sousa, J.F., Thompson, A.W., Cass, A.N.,  
453       Lorena, J., Pires, E.S., Costa, C.M., Sousa, M.P., *et al.* (2019). Deep evolutionary origin of  
454       limb and fin regeneration. *Proc. Natl. Acad. Sci. U. S. A.* 116, 15106–15115.
- 455   3.   Fröbisch Nadia B., Bickelmann Constanze, and Witzmann Florian (2014). Early evolution  
456       of limb regeneration in tetrapods: evidence from a 300-million-year-old amphibian.  
457       *Proceedings of the Royal Society B: Biological Sciences* 281, 20141550.
- 458   4.   Fröbisch, N.B., Bickelmann, C., Olori, J.C., and Witzmann, F. (2015). Deep-time evolution  
459       of regeneration and preaxial polarity in tetrapod limb development. *Nature* 527, 231–234.
- 460   5.   Voss, S.R., Palumbo, A., Nagarajan, R., Gardiner, D.M., Muneoka, K., Stromberg, A.J., and  
461       Athippozhy, A.T. (2015). Gene expression during the first 28 days of axolotl limb  
462       regeneration I: Experimental design and global analysis of gene expression. *Regeneration*  
463       (Oxf) 2, 120–136.
- 464   6.   Knapp, D., Schulz, H., Rascon, C.A., Volkmer, M., Scholz, J., Nacu, E., Le, M.,  
465       Novozhilov, S., Tazaki, A., Protze, S., *et al.* (2013). Comparative transcriptional profiling  
466       of the axolotl limb identifies a tripartite regeneration-specific gene program. *PLoS One* 8,  
467       e61352.
- 468   7.   Stewart, R., Rascon, C.A., Tian, S., Nie, J., Barry, C., Chu, L.F., Ardalani, H., Wagner, R.J.,  
469       Probasco, M.D., Bolin, J.M., *et al.* (2013). Comparative RNA-seq analysis in the  
470       unsequenced axolotl: the oncogene burst highlights early gene expression in the blastema.  
471       *PLoS Comput. Biol.* 9, e1002936.
- 472   8.   Monaghan, J.R., Athippozhy, A., Seifert, A.W., Putta, S., Stromberg, A.J., Maden, M.,  
473       Gardiner, D.M., and Voss, S.R. (2012). Gene expression patterns specific to the  
474       regenerating limb of the Mexican axolotl. *Biol. Open* 1, 937–948.
- 475   9.   Monaghan, J.R., Epp, L.G., Putta, S., Page, R.B., Walker, J.A., Beachy, C.K., Zhu, W., Pao,  
476       G.M., Verma, I.M., Hunter, T., *et al.* (2009). Microarray and cDNA sequence analysis of  
477       transcription during nerve-dependent limb regeneration. *BMC Biol.* 7, 1.
- 478   10.   Wu, C.H., Tsai, M.H., Ho, C.C., Chen, C.Y., and Lee, H.S. (2013). De novo transcriptome  
479       sequencing of axolotl blastema for identification of differentially expressed genes during  
480       limb regeneration. *BMC Genomics* 14, 434.
- 481   11.   Bryant, D.M., Johnson, K., DiTommaso, T., Tickle, T., Couger, M.B., Payzin-Dogru, D.,  
482       Lee, T.J., Leigh, N.D., Kuo, T.-H., Davis, F.G., *et al.* (2017). A Tissue-Mapped Axolotl De  
483       Novo Transcriptome Enables Identification of Limb Regeneration Factors. *Cell Rep.* 18,  
484       762–776.

- 485 12. Leigh, N.D., Dunlap, G.S., Johnson, K., Mariano, R., Oshiro, R., Wong, A.Y., Bryant,  
486 D.M., Miller, B.M., Ratner, A., Chen, A., *et al.* (2018). Transcriptomic landscape of the  
487 blastema niche in regenerating adult axolotl limbs at single-cell resolution. *Nat. Commun.*  
488 *9*, 5153.
- 489 13. Gerber, T., Murawala, P., Knapp, D., Masselink, W., Schuez, M., Hermann, S., Gac-Santel,  
490 M., Nowoshilow, S., Kageyama, J., Khattak, S., *et al.* (2018). Single-cell analysis uncovers  
491 convergence of cell identities during axolotl limb regeneration. *Science* *362*. Available at:  
492 <http://dx.doi.org/10.1126/science.aag0681>.
- 493 14. Emms, D.M., and Kelly, S. (2018). OrthoFinder2: fast and accurate phylogenomic  
494 orthology analysis from gene sequences. *bioRxiv*. Available at:  
495 <https://www.biorxiv.org/content/biorxiv/early/2018/11/08/466201.full.pdf>.
- 496 15. Shubin, N., Tabin, C., and Carroll, S. (1997). Fossils, genes and the evolution of animal  
497 limbs. *Nature* *388*, 639–648.
- 498 16. Beck, C.W., Christen, B., and Slack, J.M.W. (2003). Molecular pathways needed for  
499 regeneration of spinal cord and muscle in a vertebrate. *Dev. Cell* *5*, 429–439.
- 500 17. Mariani, F.V., Ahn, C.P., and Martin, G.R. (2008). Genetic evidence that FGFs have an  
501 instructive role in limb proximal-distal patterning. *Nature* *453*, 401–405.
- 502 18. Chiang, C., Litington, Y., Lee, E., Youngt, K.E., Cordent, J.L., Westphal, H., and Beachyt,  
503 P.A. Cyclopia and defective axial patterning in mice lacking Sonic hedgehog gene function.  
504 Available at: <https://www-nature-com.ezp-prod1.hul.harvard.edu/articles/383407a0.pdf>.
- 505 19. Dent, J.N. (1962). Limb Regeneration in Larvae and Metamorphosing Individuals of the  
506 South African Clawed Toad. *Journal of Morphology* *110*, 61–77.
- 507 20. Mescher, A.L., and Tassava, R.A. (1975). Denervation effects on DNA replication and  
508 mitosis during the initiation of limb regeneration in adult newts. *Dev. Biol.* *44*, 187–197.
- 509 21. Johnson, K., Bateman, J., DiTommaso, T., Wong, A.Y., and Whited, J.L. (2017). Systemic  
510 cell cycle activation is induced following complex tissue injury in axolotl. *Dev. Biol.*  
511 Available at: <https://www.ncbi.nlm.nih.gov/pubmed/29111100>.
- 512 22. Farkas, J.E., Freitas, P.D., Bryant, D.M., Whited, J.L., and Monaghan, J.R. (2016).  
513 Neuregulin-1 signaling is essential for nerve-dependent axolotl limb regeneration.  
514 *Development* *143*, 2724–2731.
- 515 23. Brockes, J.P., and Kintner, C.R. (1986). Glial growth factor and nerve-dependent  
516 proliferation in the regeneration blastema of Urodele amphibians. *Cell* *45*, 301–306.
- 517 24. Sugiura, T., Wang, H., Barsacchi, R., Simon, A., and Tanaka, E.M. (2016). MARCKS-like  
518 protein is an initiating molecule in axolotl appendage regeneration. *Nature* *531*, 237–240.
- 519 25. Endo, T., Bryant, S.V., and Gardiner, D.M. (2004). A stepwise model system for limb

- 520 regeneration. *Dev. Biol.* *270*, 135–145.
- 521 26. Boilly, B., and Albert, P. (1990). In vitro control of blastema cell proliferation by extracts  
522 from epidermal cap and mesenchyme of regenerating limbs of axolotls. *Roux's Arch. Dev.*  
523 *Biol.* *198*, 443–447.
- 524 27. Purushothaman, S., Elewa, A., and Seifert, A.W. (2019). Fgf-signaling is  
525 compartmentalized within the mesenchyme and controls proliferation during salamander  
526 limb development. *Elife* *8*. Available at: <http://dx.doi.org/10.7554/eLife.48507>.
- 527 28. Nacu, E., Gromberg, E., Oliveira, C.R., Drechsel, D., and Tanaka, E.M. (2016). FGF8 and  
528 SHH substitute for anterior-posterior tissue interactions to induce limb regeneration. *Nature*  
529 *533*, 407–410.
- 530 29. Korotkova, D.D., Lyubetsky, V.A., Ivanova, A.S., Rubanov, L.I., Seliverstov, A.V.,  
531 Zverkov, O.A., Martynova, N.Y., Nesterenko, A.M., Tereshina, M.B., Peshkin, L., *et al.*  
532 (2019). Bioinformatics Screening of Genes Specific for Well-Regenerating Vertebrates  
533 Reveals c-answr, a Regulator of Brain Development and Regeneration. *Cell Rep.* *29*,  
534 1027–1040.e6.
- 535 30. Godwin, J.W., Pinto, A.R., and Rosenthal, N.A. (2017). Chasing the recipe for a pro-  
536 regenerative immune system. *Semin. Cell Dev. Biol.* *61*, 71–79.
- 537 31. Hirose, K., Payumo, A.Y., Cutie, S., Hoang, A., Zhang, H., Guyot, R., Lunn, D., Bigley,  
538 R.B., Yu, H., Wang, J., *et al.* (2019). Evidence for hormonal control of heart regenerative  
539 capacity during endothermy acquisition. *Science* *364*, 184–188.
- 540 32. MacArthur, D.G., Balasubramanian, S., Frankish, A., Huang, N., Morris, J., Walter, K.,  
541 Jostins, L., Habegger, L., Pickrell, J.K., Montgomery, S.B., *et al.* (2012). A systematic  
542 survey of loss-of-function variants in human protein-coding genes. *Science* *335*, 823–828.
- 543 33. Livak, K.J., and Schmittgen, T.D. (2001). Analysis of relative gene expression data using  
544 real-time quantitative PCR and the 2(-Delta Delta C(T)) Method. *Methods* *25*, 402–408.
- 545 34. Sive, H.L., Grainger, R.M., and Harland, R.M. (2010). Early Development of *Xenopus*  
546 *Laevis* by Hazel L Sive, Robert M Grainger | Waterstones. Available at:  
547 [https://www.waterstones.com/book/early-development-of-xenopus-laevis/hazel-l-](https://www.waterstones.com/book/early-development-of-xenopus-laevis/hazel-l-sive//9780879699420)  
548 [sive//9780879699420](https://www.waterstones.com/book/early-development-of-xenopus-laevis/hazel-l-sive//9780879699420) [Accessed November 12, 2019].
- 549 35. Choi, H.M.T., Calvert, C.R., Husain, N., Huss, D., Barsi, J.C., Deverman, B.E., Hunter,  
550 R.C., Kato, M., Lee, S.M., Abelin, A.C.T., *et al.* (2016). Mapping a multiplexed zoo of  
551 mRNA expression. *Development* *143*, 3632–3637.
- 552 36. Choi, H.M.T., Schwarzkopf, M., Fornace, M.E., Acharya, A., Artavanis, G., Stegmaier, J.,  
553 Cunha, A., and Pierce, N.A. (2018). Third-generation in situ hybridization chain reaction:  
554 multiplexed, quantitative, sensitive, versatile, robust. *Development* *145*. Available at:  
555 <http://dx.doi.org/10.1242/dev.165753>.



- 556 37. Whited, J.L., Lehoczky, J.A., and Tabin, C.J. (2012). Inducible genetic system for the  
557 axolotl. *Proc. Natl. Acad. Sci. U. S. A.* *109*, 13662–13667.
- 558 38. Brennan, P. (2018). drawProteins: a Bioconductor/R package for reproducible and  
559 programmatic generation of protein schematics. *F1000Res.* *7*, 1105.
- 560 39. UniProt Consortium (2019). UniProt: a worldwide hub of protein knowledge. *Nucleic Acids*  
561 *Res.* *47*, D506–D515.
- 562 40. Hunter, S., Apweiler, R., Attwood, T.K., Bairoch, A., Bateman, A., Binns, D., Bork, P.,  
563 Das, U., Daugherty, L., Duquenne, L., *et al.* (2009). InterPro: the integrative protein  
564 signature database. *Nucleic Acids Res.* *37*, D211–5.
- 565 41. Matsuda, T., and Cepko, C.L. (2004). Electroporation and RNA interference in the rodent  
566 retina in vivo and in vitro. *Proc. Natl. Acad. Sci. U. S. A.* *101*, 16–22.

## 567 **Figure Legends**

568

569

570 **Figure 1: von Willebrand Factor D and EGF-like Domains (*vwde*) is a blastema-enriched**  
571 **gene that is found across deuterostomes.** (A) *vwde* (contig c1084387\_g3\_i1) expression in  
572 FPKM across tissues sampled from Bryant et al. *Cell Reports* 2017. Proximal and distal blastema  
573 samples are combined. (B-E) RNA *in situ* hybridization for *vwde* at (B) wound healing, (C)  
574 early-bud blastema, (D) medium-bud blastema, and (E) palette stage regenerating limbs. Black  
575 arrows indicate *vwde* expression, scale bar is 100  $\mu$ m. (F) OrthoFinder 2.0 phylogeny with  
576 corresponding protein domain structure for putative Vwde orthologs. Protein domain pictures  
577 were generated with drawProteins [38]. Species and Uniprot ID, transcriptome contig number, or  
578 Ensembl ID are included. *Polypterus vwde* contained multiple splice isoforms and the closest  
579 match to axolotl Vwde is shown here. Axolotl Vwde is denoted with (\*) and other species Vwde  
580 that are described in this manuscript are marked with (#). Orthologs to the Vwde studied in this  
581 work are indicated with brackets, paralog is also denoted with brackets.

582

583 **Figure 2: *vwde* is enriched in the regenerating fin of Lungfish (*L. paradoxus*) and *Polypterus***  
584 **(*P. senegalus*).** Expression pattern of *vwde* in the fin blastema tissues of *L. paradoxus* and *P.*  
585 *senegalus*. Longitudinal histological sections of fins from *L. paradoxus* at 21 dpa (A-B), and from  
586 *P. senegalus* at 5 dpa (C-D). (A and C) *In situ* hybridization using an anti-sense riboprobe to  
587 *vwde*. (B and D) H&E staining on sequential sections. All panels show posterior view, dorsal to  
588 the top. Dotted lines indicate amputation site (Scale bars, 1 mm in all panels).

589

590 **Figure 3: *vwde* expression is tightly linked with the regeneration-component environment.**  
591 *In situ* hybridization chain reaction probing for *vwde* in (A-F) regeneration-competent *Xenopus*  
592 *laevis* tails (A-B) prior to amputation, (C-D) blastema 24 hours post-amputation, and (E-F) the  
593 peripheral edge of the amputation plane 24 hours post-amputation. (G-L) Regeneration-  
594 refractory tails (G-H) prior to amputation, (I-J) blastema 24 hours post-amputation, and (K-L)  
595 the peripheral edge of the amputation plane 24 hours post-amputation. White arrows indicate the  
596 location of *vwde* expression. Scale bars are 100  $\mu$ m.

597

598 **Figure 4: Vwde is essential for limb regeneration.** (A) Representative images of blastemas 16  
599 days post-amputation (9 days post-morpholino administration) from control morpholino  
600 (Standard control MO), *vwde*-targeting morpholino 1 (*vwde* MO1), and *vwde*-targeting  
601 morpholino 2 (*vwde* MO2). Dotted line indicates amputation plane, blastemas are all tissue distal  
602 to amputation plane. Scale bars at 1mm. (B) Quantification of blastema length 16 days-post  
603 amputation. Median and quartiles noted with dotted lines, \*\* indicates  $P < 0.01$ , \* is  $P < 0.05$  by  
604 nested T test. (C) Representative EdU stained sections of blastemas 10 dpa (3 days post-  
605 electroporation) of control morpholino (*vwde* morpholino 1 inverted, *vwde* MO1 INV) and *vwde*-  
606 targeting morpholino 1. Scale bars are 100 $\mu$ m (D) Quantification of percent of blastema cells  
607 positive for EdU in control (*vwde* MO1 INV) and knockdown (*vwde* MO1). Each dot represents  
608 a limb, 4-5 animals per group. Median and quartiles noted with dotted lines, \*\* indicates  $P < 0.01$   
609 by nested T test. (E) Representative skeletal preparations of limbs after full regeneration after  
610 knockdown of Vwde at 7 dpa. From left to right, normal forelimb, normal hindlimb, spike, and  
611 loss of distal elements. Scale bars are 5 mm. (F) Donut plots of regenerative outcomes, pooled as  
612 abnormal versus normal from experiment with standard control morpholino, *vwde* MO1 and  
613 *vwde* MO2. Asterisk (\*) indicates  $P < 0.05$  by Fisher's exact test comparing control versus *vwde*  
614 MO1 and control versus *vwde* MO2. (G) Donut plots of regenerative outcomes, pooled as  
615 abnormal versus normal from experiment with *vwde* MO1 INV and *vwde* MO1. Asterisk (\*)  
616 indicates  $P < 0.05$  by Fisher's exact test comparing outcomes from *vwde* MO1 INV compared to  
617 *vwde* MO1.

618 Table 1. Phenotypic outcomes of morpholino-mediated knockdown in axolotl (Standard control  
619 vs. *vwde* MO1, *vwde* MO2)

|                 | Normal | Spike | Loss of distal elements | Oligodactyly | Polydactyly | Syndactyly | Additional elements |
|-----------------|--------|-------|-------------------------|--------------|-------------|------------|---------------------|
| Control         | 23     | 0     | 0                       | 0            | 0           | 1          | 0                   |
| <i>vwde</i> MO1 | 15     | 4     | 5                       | 4            | 0           | 0          | 0                   |
| <i>vwde</i> MO2 | 11     | 0     | 0                       | 3            | 1           | 1          | 0                   |

620

621

622 Table 2. Phenotypic outcomes of morpholino-mediated knockdown in axolotl (Inverted control vs.  
623 *vwde* MO1)

|                     | Normal | Spike | Loss of distal elements | Oligodactyly | Polydactyly | Syndactyly | Additional elements |
|---------------------|--------|-------|-------------------------|--------------|-------------|------------|---------------------|
| <i>Vwde</i> MO1 INV | 30     | 0     | 4                       | 4            | 0           | 0          | 0                   |
| <i>Vwde</i> MO1     | 20     | 6     | 9                       | 1            | 0           | 1          | 1                   |

624

625

626

627

628

629

630

631

632

633

634 Table 3. Oligos used for qPCR, morpholinos, and ISH probe templates.

| Primer              | Application                       | Sequence (5'- 3')                    |
|---------------------|-----------------------------------|--------------------------------------|
| Ax_vwde_ISH_F       | Riboprobe template                | TGTGGAAAGAACTTGTGCATCA               |
| Ax_vwde_ISH_R       | Riboprobe template                | TTAATCTGAAAATGGACCAGTAGATT           |
| <i>vwde</i> MO1     | Anti-sense morpholino             | ATATCCCATACATCCTTGCGTTGGC            |
| <i>vwde</i> MO2     | Anti-sense morpholino             | AGAAACCATCACAGTTCCTCACAGT            |
| <i>vwde</i> MO1 INV | Sense (control) morpholino        | CGGTTGCGTTCCTACATACCCTATA            |
| Standard control MO | Control morpholino                | CCTCTTACCTCAGTTACAATTTATA            |
| Ps_Vwde-qPCR_F      | qPCR                              | AGAATTCCTGTGACTGTGCGA                |
| Ps_Vwde-qPCR_R      | qPCR                              | TTCTGGTGTGTTGGTGAGGG                 |
| Ps_Vwde-ISH_F       | Riboprobe template                | GGCCGCGGGCATGCGGAATAATGTGTGCT        |
| Ps_Vwde-ISH_R       | Riboprobe template                | CCCGGGGCAGTCCAGTCTTCAGCAGTGTG        |
| Lp_Vwde-qPCR_F      | qPCR                              | TTCTTCTGGAGACCCCTGAT                 |
| Lp_Vwde-qPCR_R      | qPCR                              | GGTCTTGCTGGCTAGTGTCAG                |
| Lp_Vwde-ISH_F       | Riboprobe template                | GGCCGCGGAGCTAACAGCCTGTGCAACAT        |
| Lp_Vwde-ISH_R       | Riboprobe template                | CCCGGGGCATCAGGGGTCTCCAAGAAGAA        |
| 3'_T7 universal     | Riboprobe template, 2nd-round PCR | AGGGATCCTAATACGACTCACTATAGGGCCCGGGGC |
| 5'_T7 universal     | Riboprobe template, 2nd-round PCR | GAGAATTCTAATACGACTCACTATAGGGCCGCGG   |

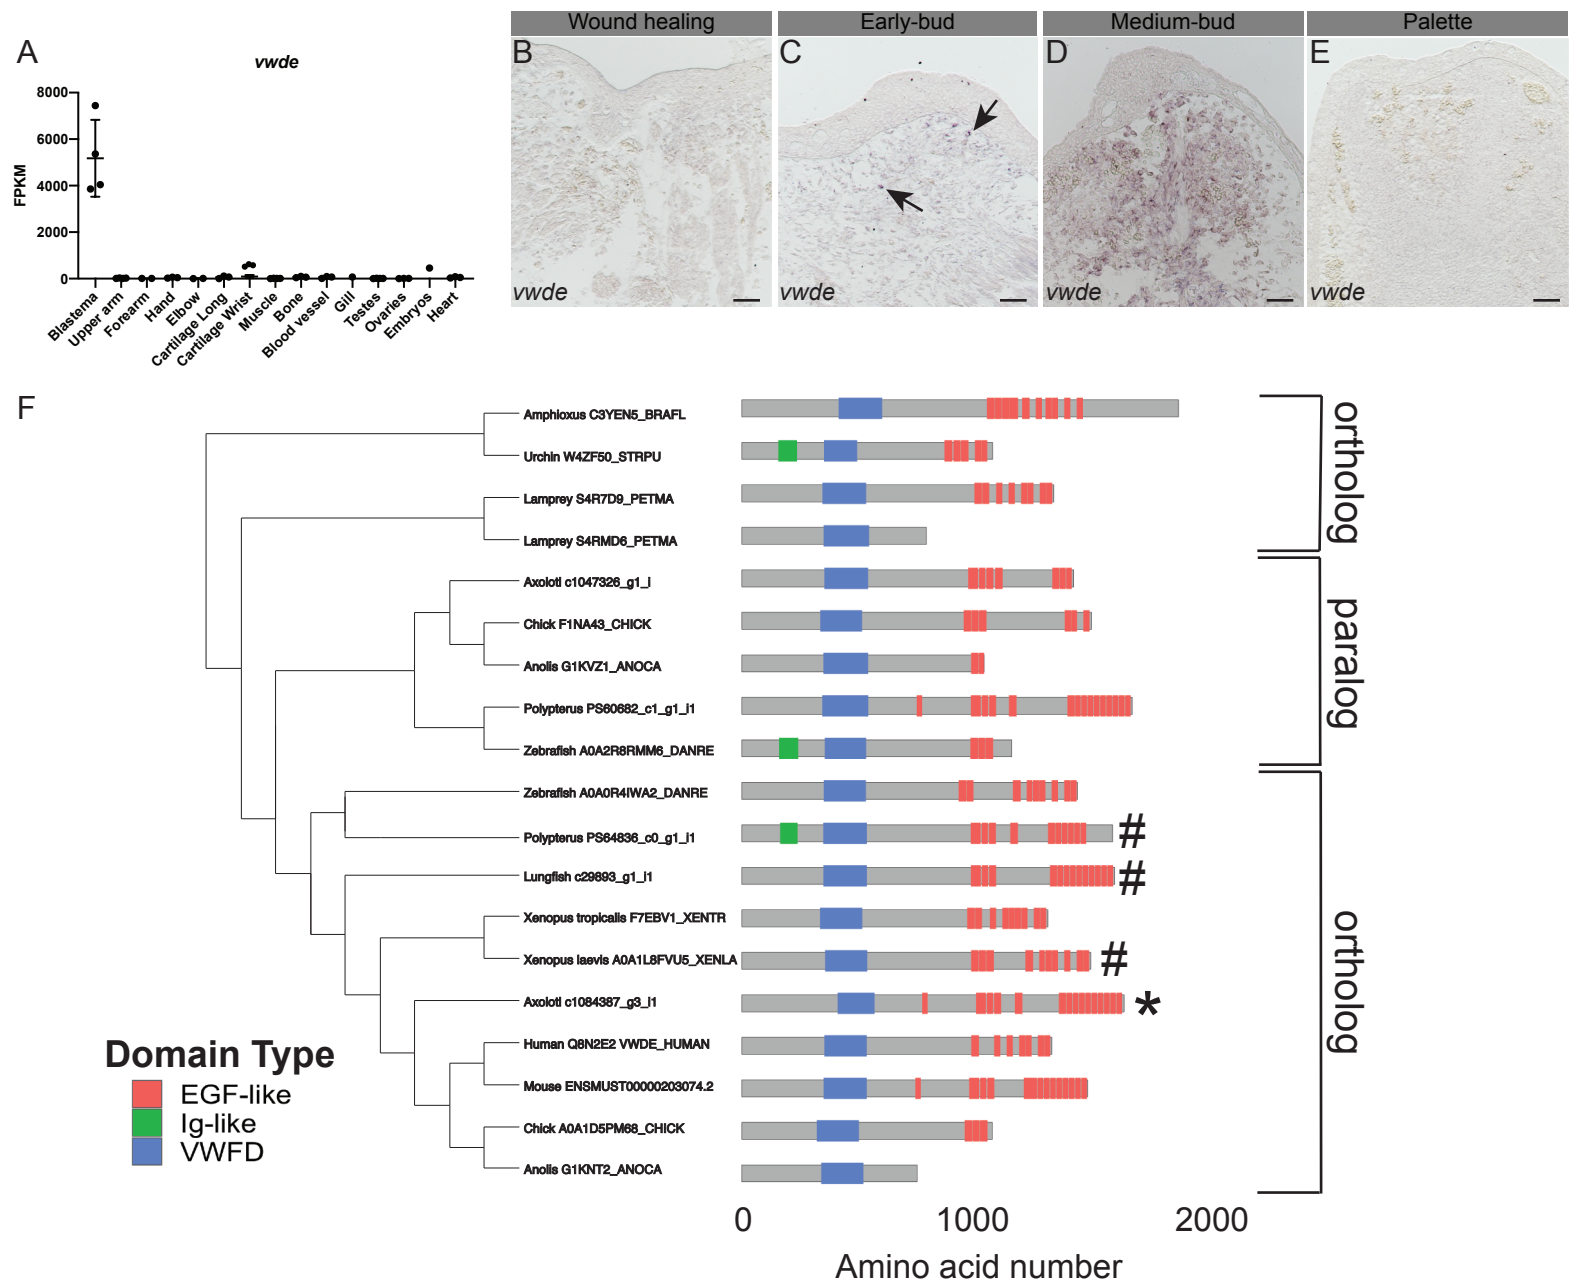

## Figure 2

*L. paradoxa*

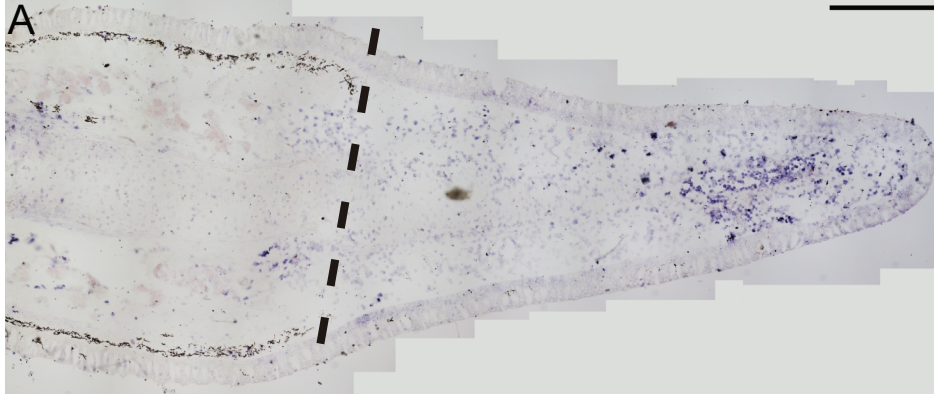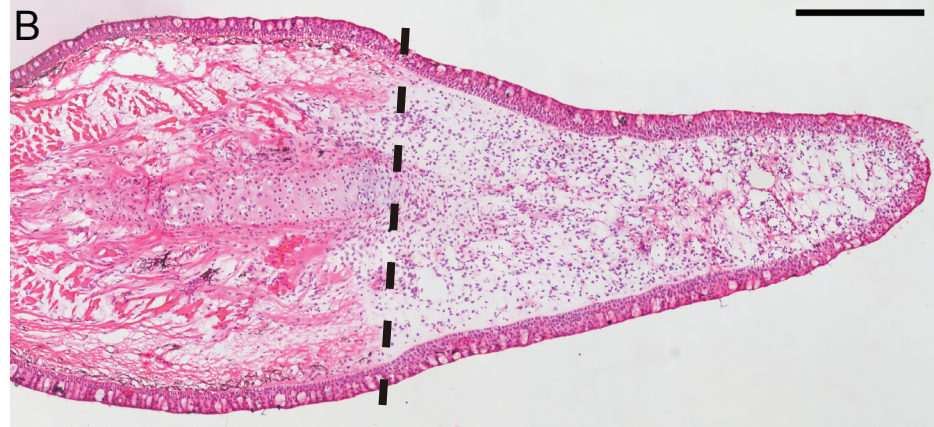

*P. senegalus*

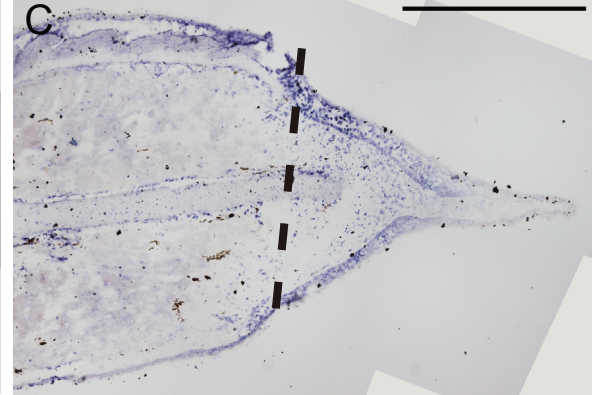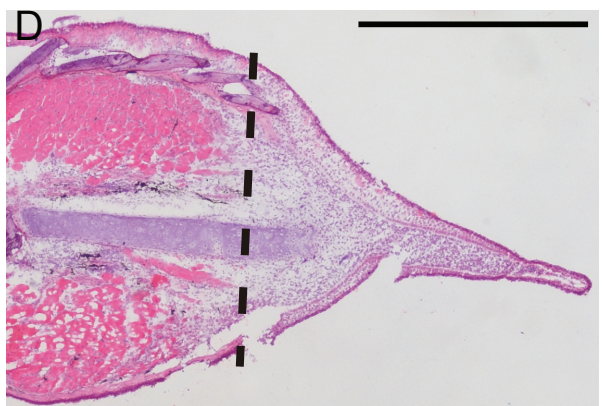

## Figure 3

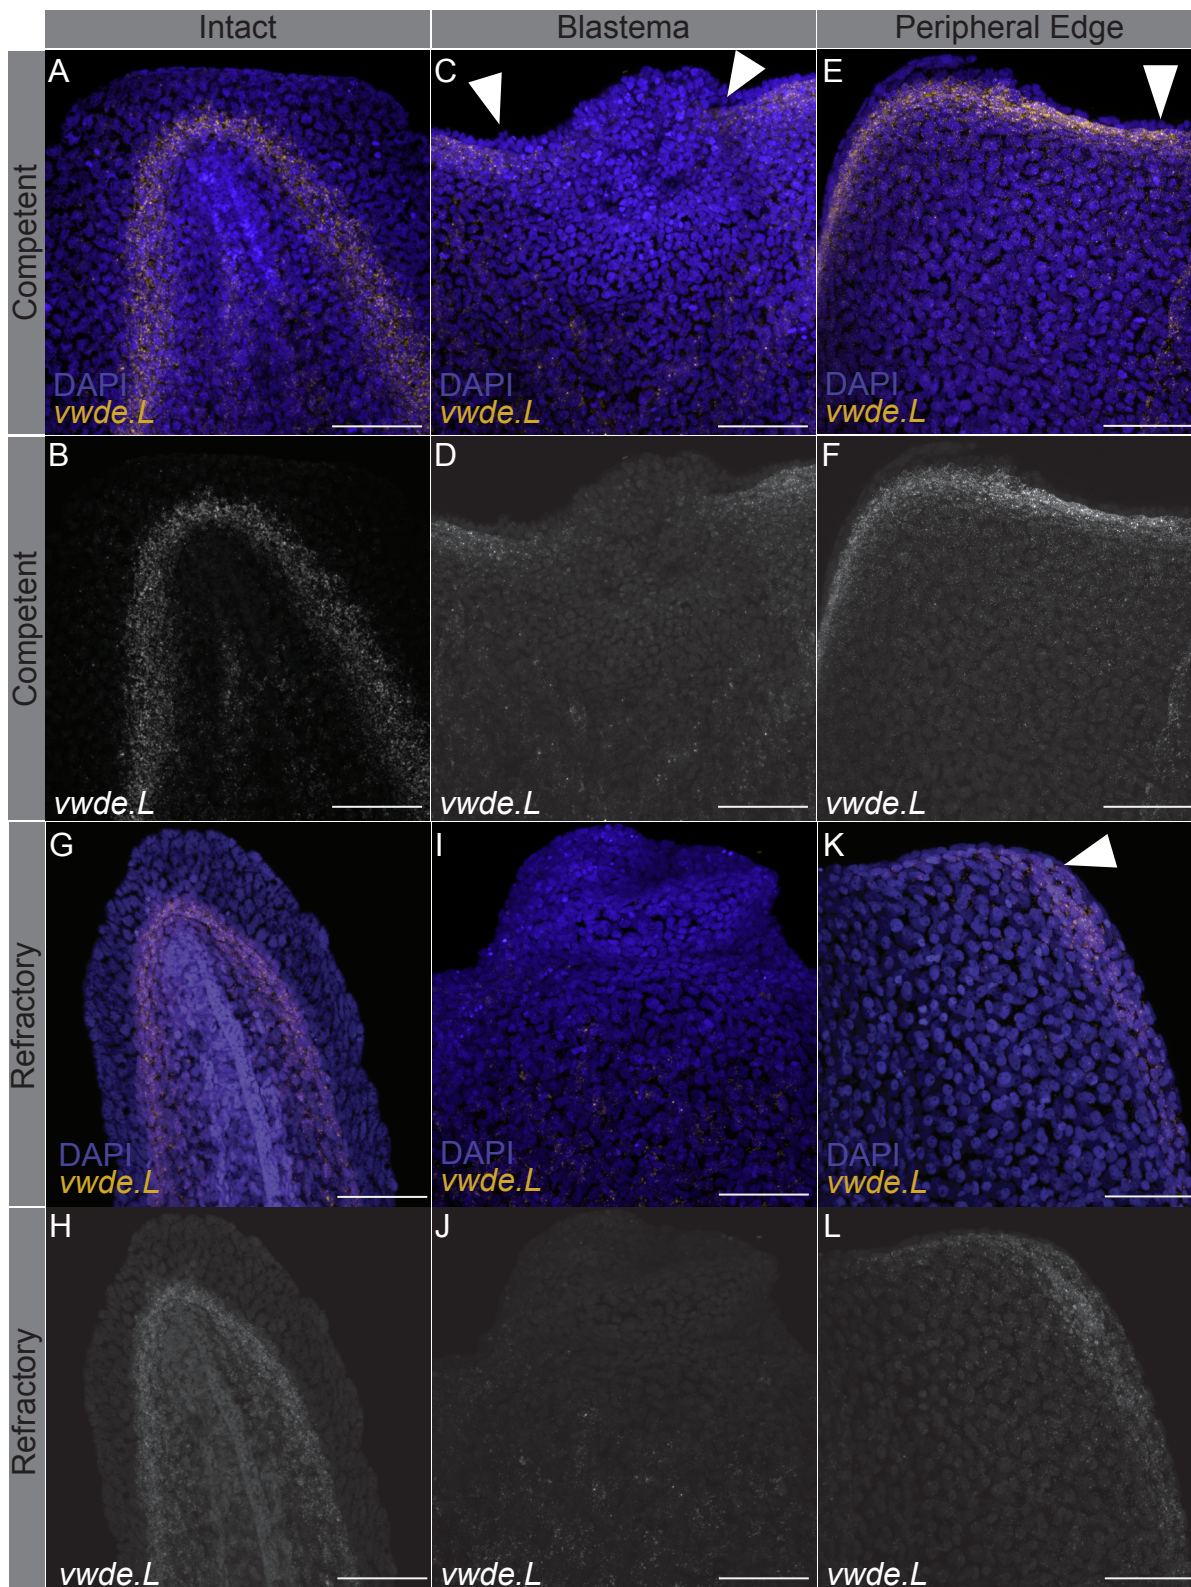

# Figure 4

A

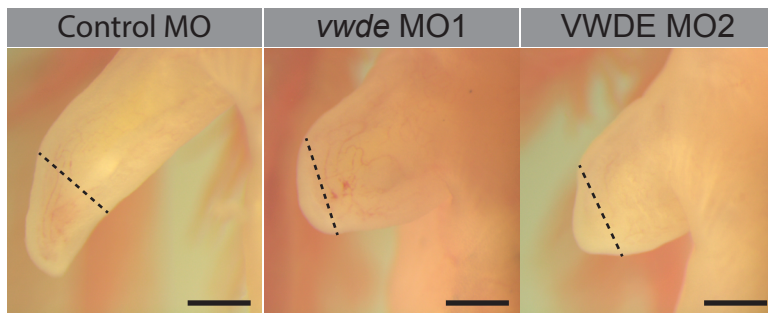

B

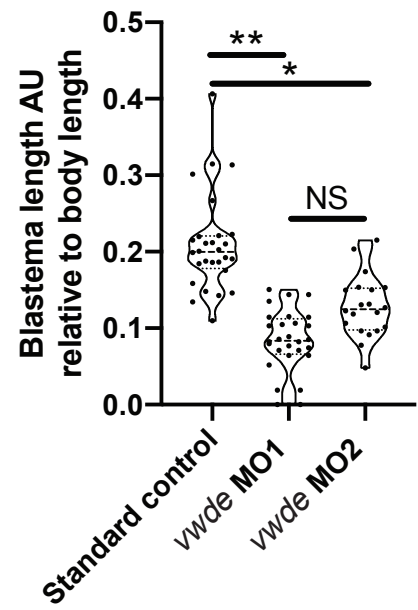

C

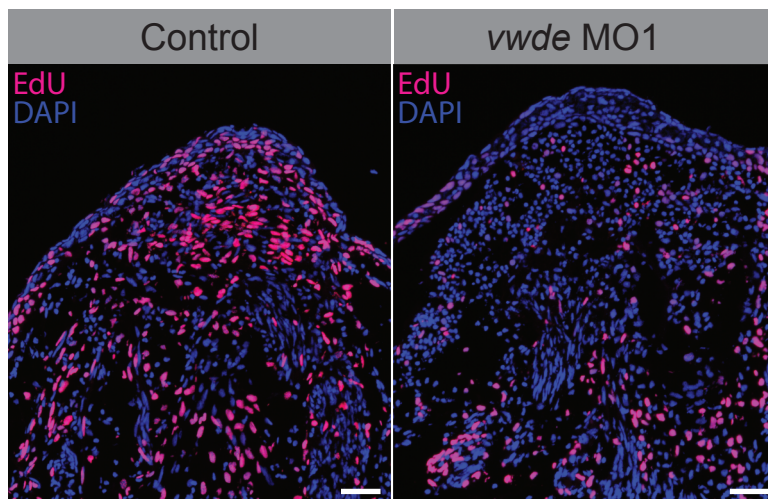

D

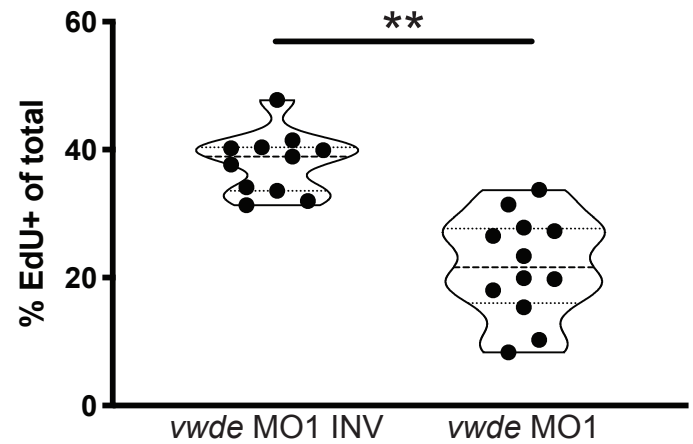

E

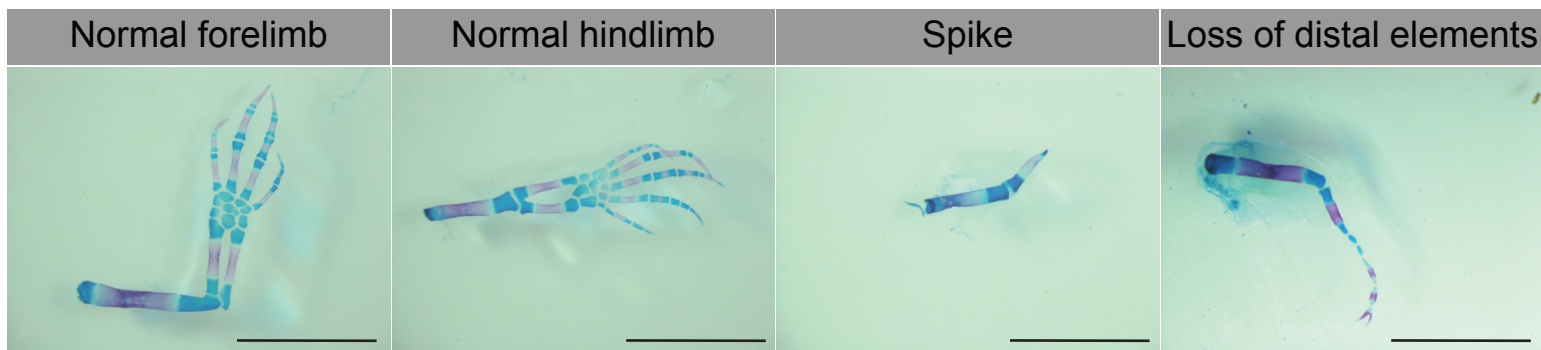

F

Experiment 1

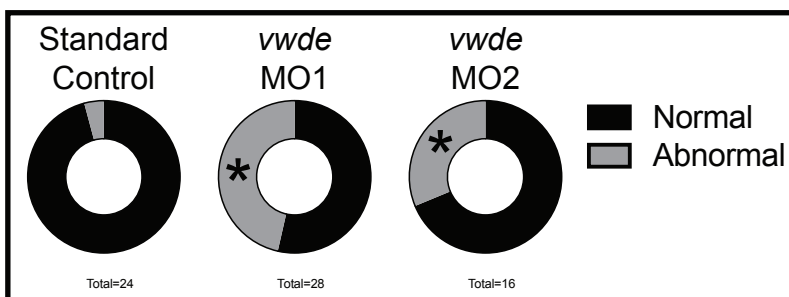

G

Experiment 2

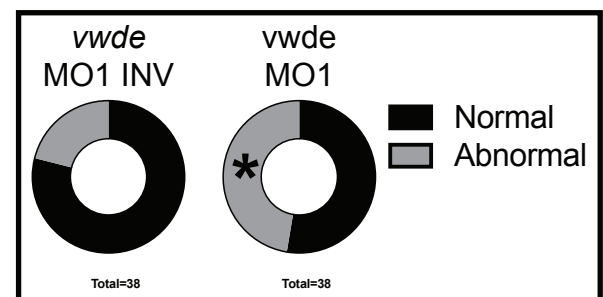

Source: https://www.biorxiv.org/content/10.1101/842948v2.full.pdf
